# Supplementary material for: Comparing Hydrogen Deuterium Exchange and Fast Photochemical Oxidation of Proteins: a Structural Characterisation of Wild-Type and ΔN6 β2-Microglobulin
Source: PubMed Central journal article supplement (PMC6276068; doi:10.1007/s13361-018-2067-y), 2018-09-28
Supplement: 13361_2018_2067_MOESM1_ESM.pdf [file 13361_2018_2067_MOESM1_ESM.pdf]

**Comparing Hydrogen Deuterium Exchange and Fast Photochemical Oxidation of Proteins:  
a structural characterisation of wild-type  $\beta_2$ -microglobulin and  $\Delta N6$**

**Owen Cornwell, Sheena E. Radford, Alison E. Ashcroft, James R. Ault**

**Astbury Centre for Structural Molecular Biology, Faculty of Biological Sciences, University  
of Leeds, Leeds, LS2 9JT, UK**

## **SUPPLEMENTARY INFORMATION**

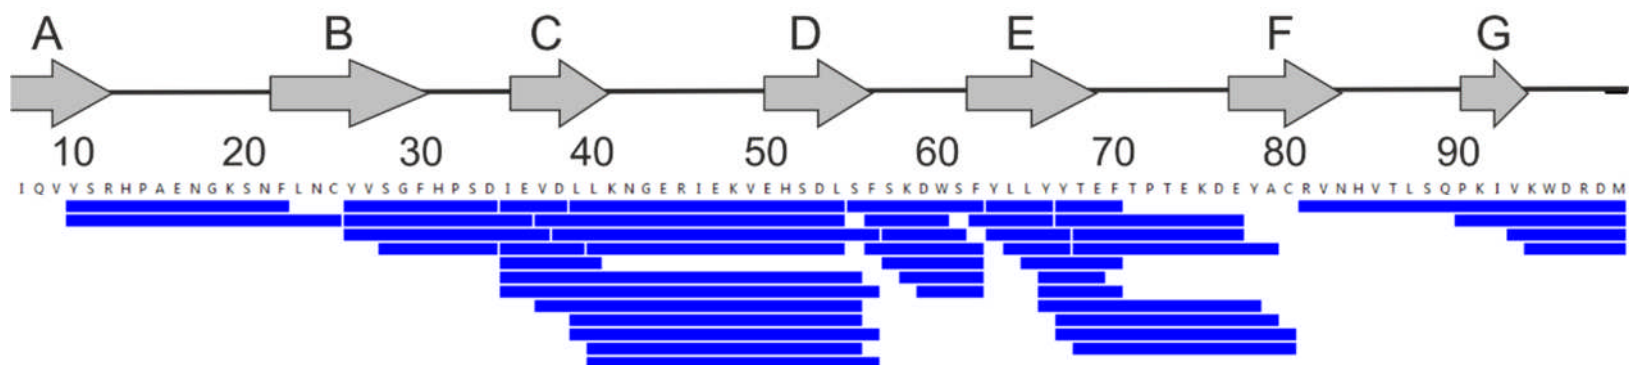

**Figure S1. Peptide coverage of  $\beta_2m$  from the HDX-MS experiment (considering only the residues from 7-100 in order to compare wild-type  $\beta_2m$  and  $\Delta N6$ ).**

Peptides shown are those that passed the identification criteria (see Methods section in the Main Text for details) in *both* proteins so that a like-for-like comparison of uptake data could be made for the whole peptide list. Residues are numbered as in the full sequence for recombinant wild-type  $\beta_2m$ ;  $\beta$ -strands are labelled A – G (PDB: 2XKS).

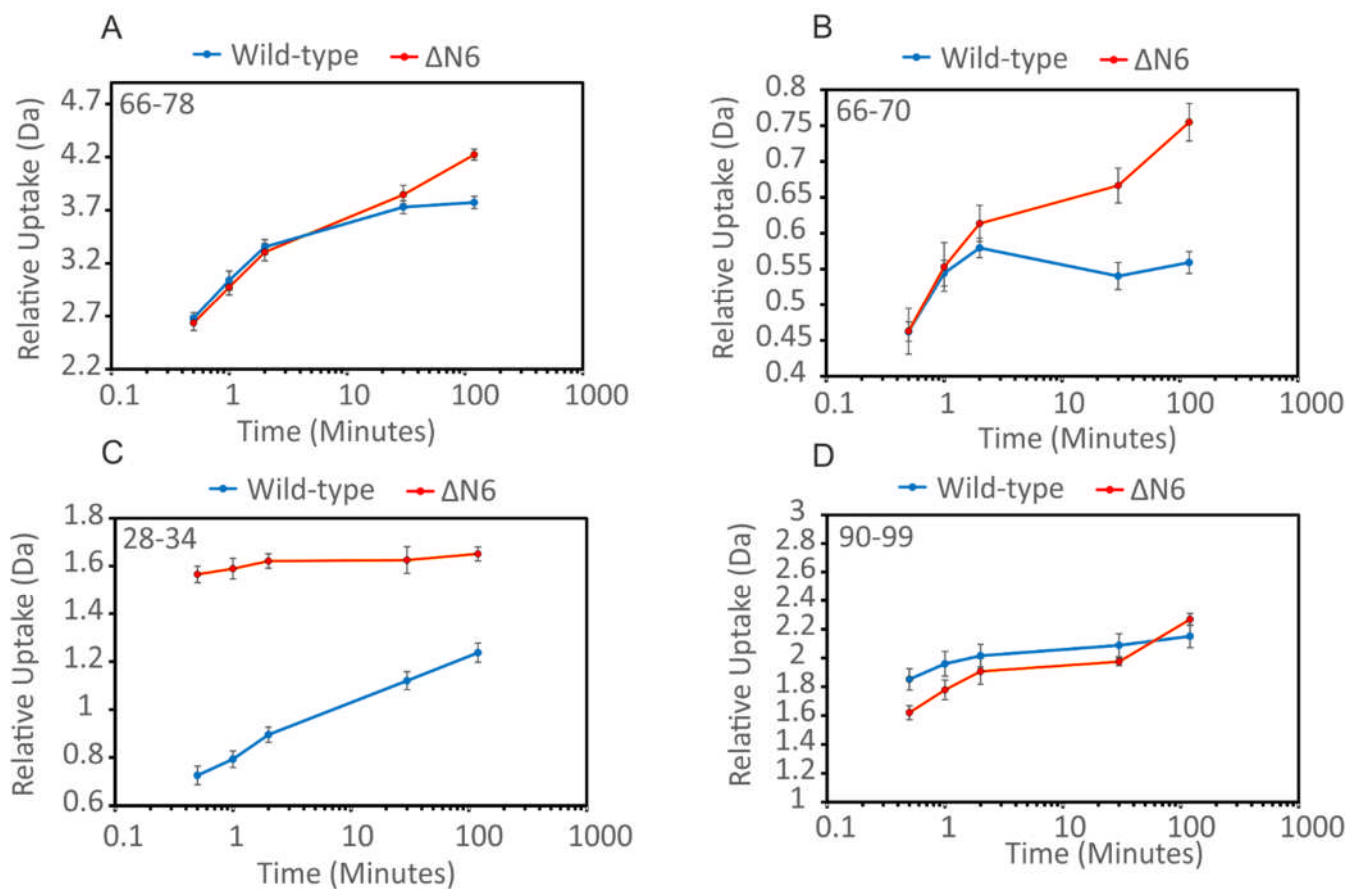

**Figure S2. HDX uptake plots of wild-type (blue) and  $\Delta N6$  (red)  $\beta_2m$  showing regions of difference between wild-type  $\beta_2m$  and  $\Delta N6$ .**

These peptides overlap with the ones highlighted in the Main Text, Fig. 2. The residues covered by each peptide are shown in the top left corner of each plot.

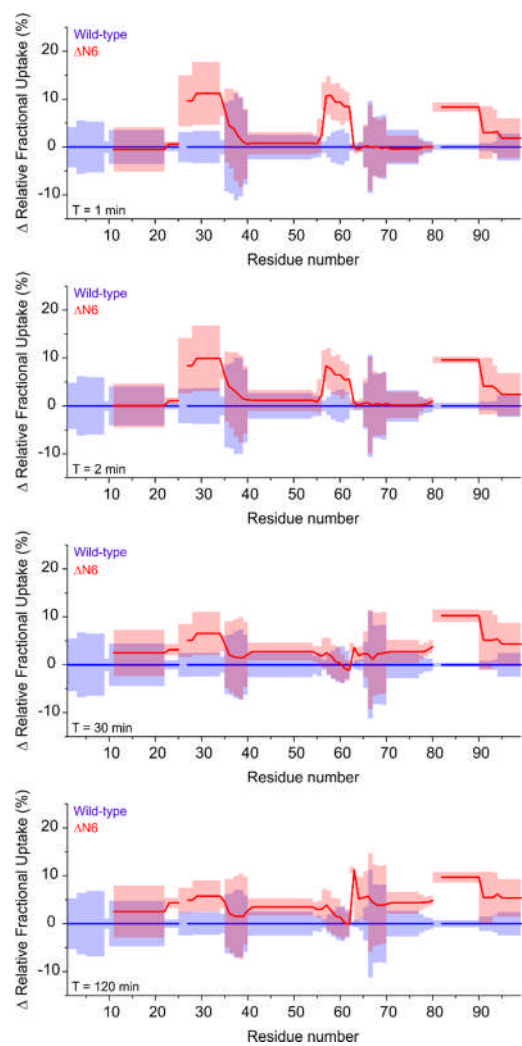

**Figure S3. PAVED difference plots for wild-type  $\beta_2m$  and  $\Delta N6$  HDX-MS data.**

Shaded regions show combined standard deviation per residue for wild-type (blue) and  $\Delta N6$  (red). Time-points (1 min, 2 min, 30 min and 120 min) are shown in the bottom left corner of each difference plot.

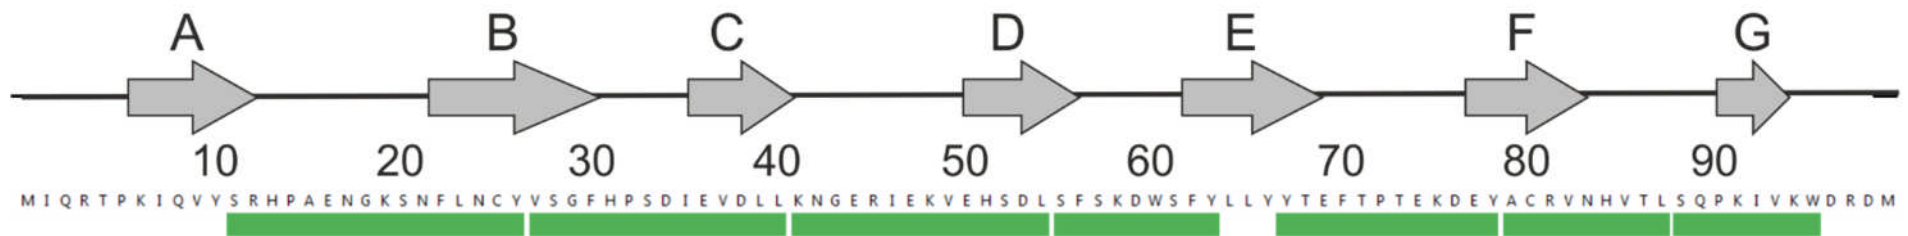

**Figure S4. Peptide coverage of  $\beta_2m$  from the FPOP quantification experiment (considering only the residues from 7-100 in order to compare wild-type  $\beta_2m$  and  $\Delta N6$ ).**

Peptides (green bars) shown are those that were identified reproducibly using LC-MS/MS in both wild-type  $\beta_2m$  and  $\Delta N6$  after FPOP photolysis followed by chymotrypsin digestion. Residues are numbered as in the full sequence for recombinant wild-type  $\beta_2m$ . The  $\beta$ -strands are labelled A – G.

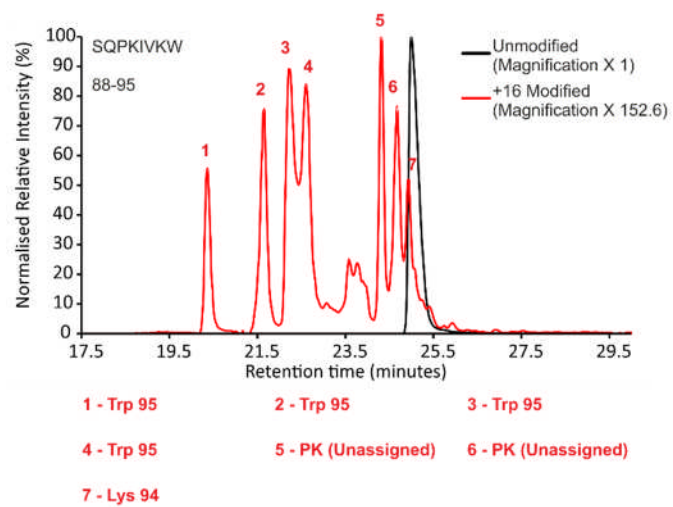

**Figure S5. Extracted Ion Chromatograms (XIC) from LC-MS/MS data showing FPOP oxidations for peptide 88-95 (sequence SQPKIVKW).**

Overlaid extracted ion chromatograms of the unmodified peptide (black peak) and +16 Da modified peptides (red peaks).

**Table S1. Summary of raw data and interpretation for the identified FPOP modifications.**

| Unmodified                      |             | Modified           |                  |                                |                                  |                                    |            |                                                                                                                                                                                                                                                                                                                                                                                                                               |
|---------------------------------|-------------|--------------------|------------------|--------------------------------|----------------------------------|------------------------------------|------------|-------------------------------------------------------------------------------------------------------------------------------------------------------------------------------------------------------------------------------------------------------------------------------------------------------------------------------------------------------------------------------------------------------------------------------|
| Peptide                         | <i>m/z</i>  | $\Delta$ mass (Da) | <i>m/z</i>       | $\Delta$ RT ( $\pm$ S.D) (min) | Wild-type (% Modified $\pm$ S.D) | $\Delta$ N6 (% Modified $\pm$ S.D) | Assignment | Assignment Criteria                                                                                                                                                                                                                                                                                                                                                                                                           |
| <b>SRHPAENGKSNFLNCY (11-26)</b> | 947.43 (2+) | +16                | 478.21 (3+)      | +2.67 $\pm$ 0.08               | 1.41 $\pm$ 0.29                  | 1.89 $\pm$ 0.45                    | His 13     | MS/MS                                                                                                                                                                                                                                                                                                                                                                                                                         |
|                                 | 631.96 (3+) |                    |                  |                                |                                  |                                    |            |                                                                                                                                                                                                                                                                                                                                                                                                                               |
|                                 | 474.22 (4+) |                    |                  |                                |                                  |                                    |            |                                                                                                                                                                                                                                                                                                                                                                                                                               |
|                                 |             | +16                | 478.21 (4+)      | +0.65 $\pm$ 0.04               | 0.23 $\pm$ 0.04                  | 0.23 $\pm$ 0.02                    | Phe 22     | MS/MS                                                                                                                                                                                                                                                                                                                                                                                                                         |
|                                 |             | +16                | 478.21 (4+)      | +0.24 $\pm$ 0.07               | 0.21 $\pm$ 0.04                  | 0.18 $\pm$ 0.05                    | Tyr 26     | MS/MS                                                                                                                                                                                                                                                                                                                                                                                                                         |
|                                 |             | +16                | 478.21 (4+)      | -0.064 $\pm$ 0.04              | 0.51 $\pm$ 0.04                  | 0.56 $\pm$ 0.04                    | Lys 19     | MS/MS                                                                                                                                                                                                                                                                                                                                                                                                                         |
|                                 |             | +16                | 478.21 (4+)      | -1.06 $\pm$ 0.06               | 0.47 $\pm$ 0.08                  | 0.66 $\pm$ 0.05                    | Tyr 26     | MS/MS                                                                                                                                                                                                                                                                                                                                                                                                                         |
|                                 | +16         | 478.21 (4+)        | -2.46 $\pm$ 0.07 | 0.18 $\pm$ 0.00                | 0.24 $\pm$ 0.04                  | Phe 22                             | MS/MS      |                                                                                                                                                                                                                                                                                                                                                                                                                               |
|                                 | +16         | 478.21 (4+)        | -3.27 $\pm$ 0.06 | 0.21 $\pm$ 0.02                | 0.52 $\pm$ 0.14                  | Phe 22                             | MS/MS      |                                                                                                                                                                                                                                                                                                                                                                                                                               |
| <b>VSGFHPSDIEVDLL (27-40)</b>   | 764.38 (2+) | + 16               | 772.38 (2+)      | +6.55 $\pm$ 0.26               | 0.39 $\pm$ 0.04                  | 0.26 $\pm$ 0.02                    | His 31     | MS/MS                                                                                                                                                                                                                                                                                                                                                                                                                         |
|                                 |             | +16                | 772.38 (2+)      | -1.98 $\pm$ 0.18               | 0.15 $\pm$ 0.02                  | 0.20 $\pm$ 0.01                    | Phe 30     | MS/MS                                                                                                                                                                                                                                                                                                                                                                                                                         |
|                                 |             | +16                | 772.38 (2+)      | -3.26 $\pm$ 0.28               | 0.20 $\pm$ 0.02                  | 0.28 $\pm$ 0.00                    | Phe 30     | <ol style="list-style-type: none"> <li>1. MS/MS narrows modification site to GFH</li> <li>2. Phe is &gt;405X more reactive than Gly</li> <li>3. Although His and Phe have similar reactivities – His on this peptide was already assigned and has only ever observed here as one +16 Da peak</li> <li>4. All other +16 Da His modifications identified have retention times <i>longer</i> than the unmodified peak</li> </ol> |

|                                   |                                          |     |             |              |              |              |        |                                                                                                                                                                                                                           |
|-----------------------------------|------------------------------------------|-----|-------------|--------------|--------------|--------------|--------|---------------------------------------------------------------------------------------------------------------------------------------------------------------------------------------------------------------------------|
|                                   |                                          | +16 | 772.38 (2+) | -4.20 ± 0.29 | 0.07 ± 0.01  | 0.34 ± 0.03  | Phe 30 | MS/MS                                                                                                                                                                                                                     |
|                                   |                                          | +16 | 772.38 (2+) | -5.06 ± 0.46 | 0.05 ± 0.01  | Not detected | Ile 35 | MS/MS                                                                                                                                                                                                                     |
|                                   |                                          | +16 | 772.38 (2+) | -6.14 ± 0.32 | 0.13 ± 0.01  | 0.06 ± 0.02  | Val 27 | MS/MS                                                                                                                                                                                                                     |
| <b>KNGERIEKVEHSDL<br/>(41-54)</b> | 827.43 (2+)<br>551.96 (3+)<br>414.22 (4) | +16 | 557.29 (3+) | +1.86 ± 0.05 | 0.96 ± 0.62  | 2.27 ± 0.23  | His 51 | MS/MS                                                                                                                                                                                                                     |
|                                   |                                          | +16 | 557.29 (3+) | -0.06 ± 0.04 | 0.19 ± 0.05  | 0.17 ± 0.11  | Lys 48 | MS/MS                                                                                                                                                                                                                     |
| <b>SFSKDWSFY<br/>(55-63)</b>      | 583.76 (2+)                              | +16 | 591.76 (2+) | -2.74 ± 0.05 | 4.32 ± 0.95  | 13.58 ± 2.63 | Trp 60 | MS/MS                                                                                                                                                                                                                     |
|                                   |                                          | +16 | 591.76 (2+) | -3.58 ± 0.15 | 5.51 ± 1.02  | 16.93 ± 3.05 | Trp 60 | MS/MS                                                                                                                                                                                                                     |
|                                   |                                          | +16 | 591.76 (2+) | -4.08 ± 0.11 | 29.31 ± 2.63 | 8.65 ± 1.29  | Trp 60 | MS/MS                                                                                                                                                                                                                     |
|                                   |                                          | +16 | 591.76 (2+) | -6.61 ± 0.07 | 5.57 ± 2.83  | 3.36 ± 2.01  | Trp 60 | MS/MS                                                                                                                                                                                                                     |
|                                   |                                          | +16 | 591.76 (2+) | -7.02 ± 0.06 | 5.90 ± 0.32  | 10.82 ± 0.09 | Trp 60 | MS/MS                                                                                                                                                                                                                     |
|                                   |                                          | +32 | 599.75 (2+) | -2.99 ± 0.05 | 29.65 ± 2.04 | 18.71 ± 6.23 | Trp 60 | MS/MS                                                                                                                                                                                                                     |
|                                   |                                          | +32 | 599.75 (2+) | -6.20 ± 0.05 | 7.03 ± 1.48  | 7.48 ± 1.85  | Trp 60 | MS/MS                                                                                                                                                                                                                     |
|                                   |                                          | +32 | 599.75 (2+) | -7.77 ± 0.08 | 6.20 ± 0.75  | 8.58 ± 2.92  | Trp 60 | MS/MS                                                                                                                                                                                                                     |
|                                   |                                          | +32 | 599.75 (2+) | -9.21 ± 0.09 | 4.16 ± 0.64  | 3.55 ± 0.91  | Trp 60 | <ol style="list-style-type: none"> <li>1. MS/MS identifies modification site to WSFY</li> <li>2. Trp is the most reactive residue on the peptide</li> <li>3. All 8 other modified peaks in the XIC were Trp 60</li> </ol> |
| <b>YTEFTPTEKDEY<br/>(67-78)</b>   | 761.83 (2+)                              | +16 | 769.82 (2+) | -0.26 ± 0.04 | 0.35 ± 0.01  | 0.30 ± 0.07  | Tyr 67 | <ol style="list-style-type: none"> <li>1. MS/MS narrows modification site to YTE</li> <li>2. Tyr is &gt;25X more reactive than Thr and &gt; 56X more reactive than Glu</li> </ol>                                         |
|                                   |                                          | +16 | 769.82 (2+) | -0.74 ± 0.04 | 0.78 ± 0.13  | 0.94 ± 0.02  | Tyr 78 | MS/MS                                                                                                                                                                                                                     |
|                                   |                                          | +16 | 769.82 (2+) | -1.16 ± 0.04 | 0.06 ± 0.01  | 0.06 ± 0.01  | Tyr 67 | <ol style="list-style-type: none"> <li>1. MS/MS narrows modification site to YT</li> <li>2. Tyr is 25X more reactive than Thr</li> </ol>                                                                                  |
|                                   |                                          | +16 | 769.82 (2+) | -1.34 ± 0.05 | 0.09 ± 0.01  | 0.08 ± 0.01  | Tyr 78 | <ol style="list-style-type: none"> <li>1. MS/MS narrows modification site to KDEY</li> <li>2. Tyr is &gt;34X more reactive than Lys, 56X more reactive than Glu and &gt;173X more reactive than Asp</li> </ol>            |



|                              |                            |     |             |              |             |             |            |                                                                                                                                                                                                                             |
|------------------------------|----------------------------|-----|-------------|--------------|-------------|-------------|------------|-----------------------------------------------------------------------------------------------------------------------------------------------------------------------------------------------------------------------------|
|                              |                            | +16 | 769.82 (2+) | -2.65 ± 0.06 | 0.02 ± 0.00 | 0.02 ± 0.00 | Phe 70     | MS/MS                                                                                                                                                                                                                       |
|                              |                            | +16 | 769.82 (2+) | -3.17 ± 0.06 | 0.03 ± 0.00 | 0.03 ± 0.00 | Phe 70     | MS/MS                                                                                                                                                                                                                       |
|                              |                            | +16 | 769.82 (2+) | -3.36 ± 0.07 | 0.02 ± 0.00 | 0.02 ± 0.00 | Phe 70     | MS/MS                                                                                                                                                                                                                       |
| <b>ACRVNHVTL<br/>(79-87)</b> | 535.28 (2+)<br>357.19 (3+) | +16 | 362.52 (3+) | +4.37 ± 0.07 | 0.12 ± 0.03 | 0.45 ± 0.07 | His 84     | MS/MS                                                                                                                                                                                                                       |
| <b>SQPKIVKW<br/>(88-95)</b>  | 493.29 (2+)                | +16 | 501.29 (2+) | -0.07 ± 0.07 | 0.18 ± 0.01 | 0.21 ± 0.01 | Lys 94     | MS/MS                                                                                                                                                                                                                       |
|                              |                            | +16 | 501.29 (2+) | -0.44 ± 0.12 | 0.39 ± 0.01 | 0.32 ± 0.03 | Unassigned | <ol style="list-style-type: none"> <li>1. MS/MS narrows modification to Pro 90 or Lys 91</li> <li>2. Both have similar reactivities (approx. 2 fold difference)</li> <li>3. Pro can have &gt;1 structural isomer</li> </ol> |
|                              |                            | +16 | 501.29 (2+) | -0.79 ± 0.11 | 0.35 ± 0.03 | 0.32 ± 0.01 | Unassigned | <ol style="list-style-type: none"> <li>1. MS/MS narrows modification to Pro 90 or Lys 91</li> <li>2. Both have similar reactivities (approx. 2 fold difference)</li> <li>3. Pro can have &gt;1 structural isomer</li> </ol> |
|                              |                            | +16 | 501.29 (2+) | -2.54 ± 0.14 | 0.35 ± 0.01 | 0.35 ± 0.11 | Trp 95     | MS/MS                                                                                                                                                                                                                       |
|                              |                            | +16 | 501.29 (2+) | -2.94 ± 0.14 | 0.43 ± 0.07 | 0.39 ± 0.08 | Trp 95     | MS/MS                                                                                                                                                                                                                       |
|                              |                            | +16 | 501.29 (2+) | -3.46 ± 0.14 | 0.17 ± 0.07 | 0.36 ± 0.02 | Trp 95     | MS/MS                                                                                                                                                                                                                       |
|                              |                            | +16 | 501.29 (2+) | -4.73 ± 0.13 | 0.15 ± 0.08 | 0.16 ± 0.04 | Trp 95     | MS/MS                                                                                                                                                                                                                       |

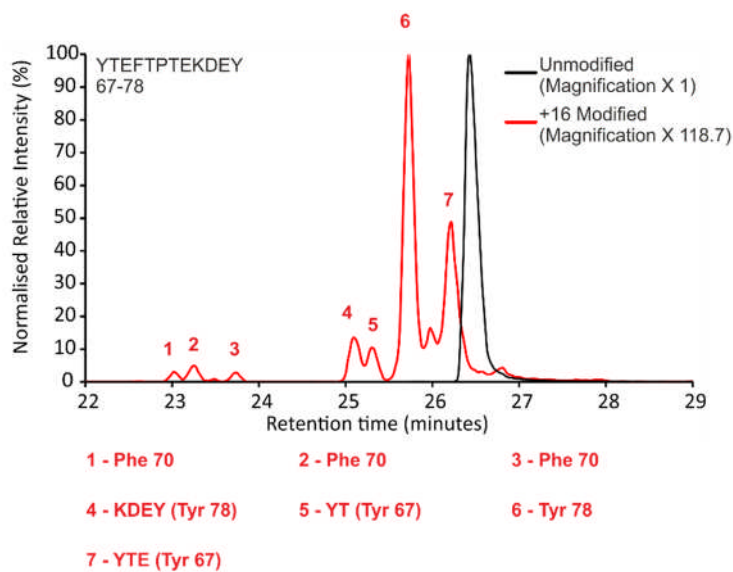

**Figure S6. Extracted Ion Chromatograms (XIC) from LC-MS/MS data showing FPOP oxidations for peptide 67-78 (sequence YTEFTPTEKDEY).**

Overlaid extracted ion chromatograms of the unmodified peptide (black peak) and +16 Da modified peptides (red peaks).

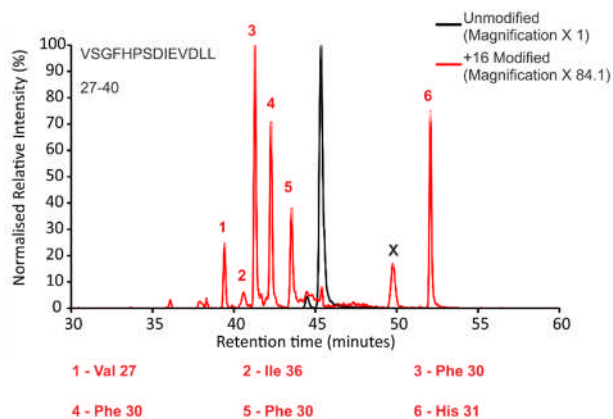

**Figure S7. Extracted Ion Chromatograms (XIC) from LC-MS/MS data showing FPOP oxidations for peptide 27-40 (sequence VSGFHPSDIEVDLL).**

Overlaid extracted ion chromatograms of the unmodified peptide (black peak) and +16 Da modified peptides (red peaks). Black X indicates a peptide not identified as present in the sequence of either wild-type or  $\Delta N6$   $\beta_2m$ .

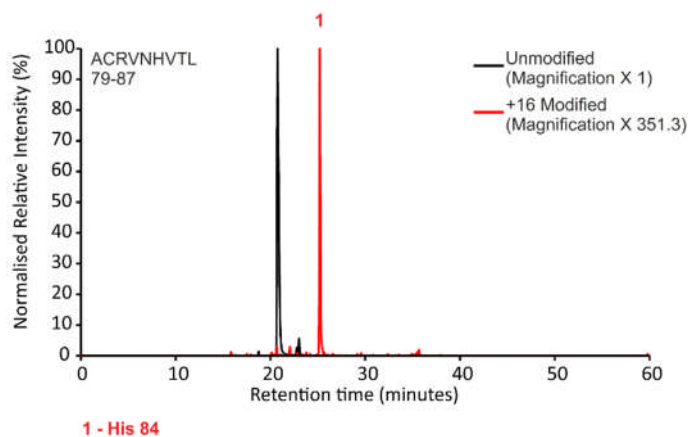

**Figure S8: Extracted Ion Chromatograms (XIC) from LC-MS/MS data showing FPOP oxidations for peptide 79-87 (sequence ACRVNHVTL).**

Overlaid extracted ion chromatograms of the unmodified peptide (black peak) and +16 Da modified peptides (red peaks).

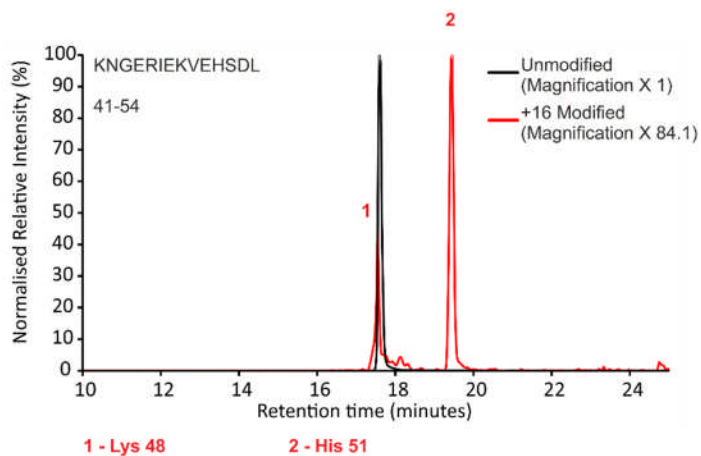

**Figure S9. Extracted Ion Chromatograms (XIC) from LC-MS/MS data showing FPOP oxidations for peptide 41-54 (sequence KNGERIEKVEHSDL).**

Overlaid extracted ion chromatograms of the unmodified peptide (black peak) and +16 Da modified peptides (red peaks).

**Table S2: *para* : *meta* : *ortho* ratios of each of the phenylalanine residues identified by FPOP in wild-type and  $\Delta N6$   $\beta_2m$ .**

| Residue                 | Phe22       |             | Phe30       |             | Phe70       |             |
|-------------------------|-------------|-------------|-------------|-------------|-------------|-------------|
|                         | Wild-type   | $\Delta N6$ | Wild-type   | $\Delta N6$ | Wild-type   | $\Delta N6$ |
| Isomer Ratio (P:M:O)    | 1.16:1:1.27 | 2.15:1:0.94 | 0.35:1:0.76 | 1.19:1:0.70 | 0.57:1:0.54 | 0.47:1:0.52 |
| SASA ( $\text{\AA}^2$ ) | ~88.3       | ~105.2      | ~2.2        | ~48.8       | ~11.0       | ~5.7        |
| % solvent exposed       | ~49%        | ~58.4%      | ~1.2%       | ~27.1%      | ~6.1%       | ~3.2%       |
